# Supplementary material
Source: PubMed Central journal article supplement (PMC8366194)

# VENOUS THROMBOEMBOLISM IN COVID-19: A SYSTEMATIC REVIEW AND META-ANALYSIS

Supplemental Figure S1. Assessment of the risk of bias of included studies

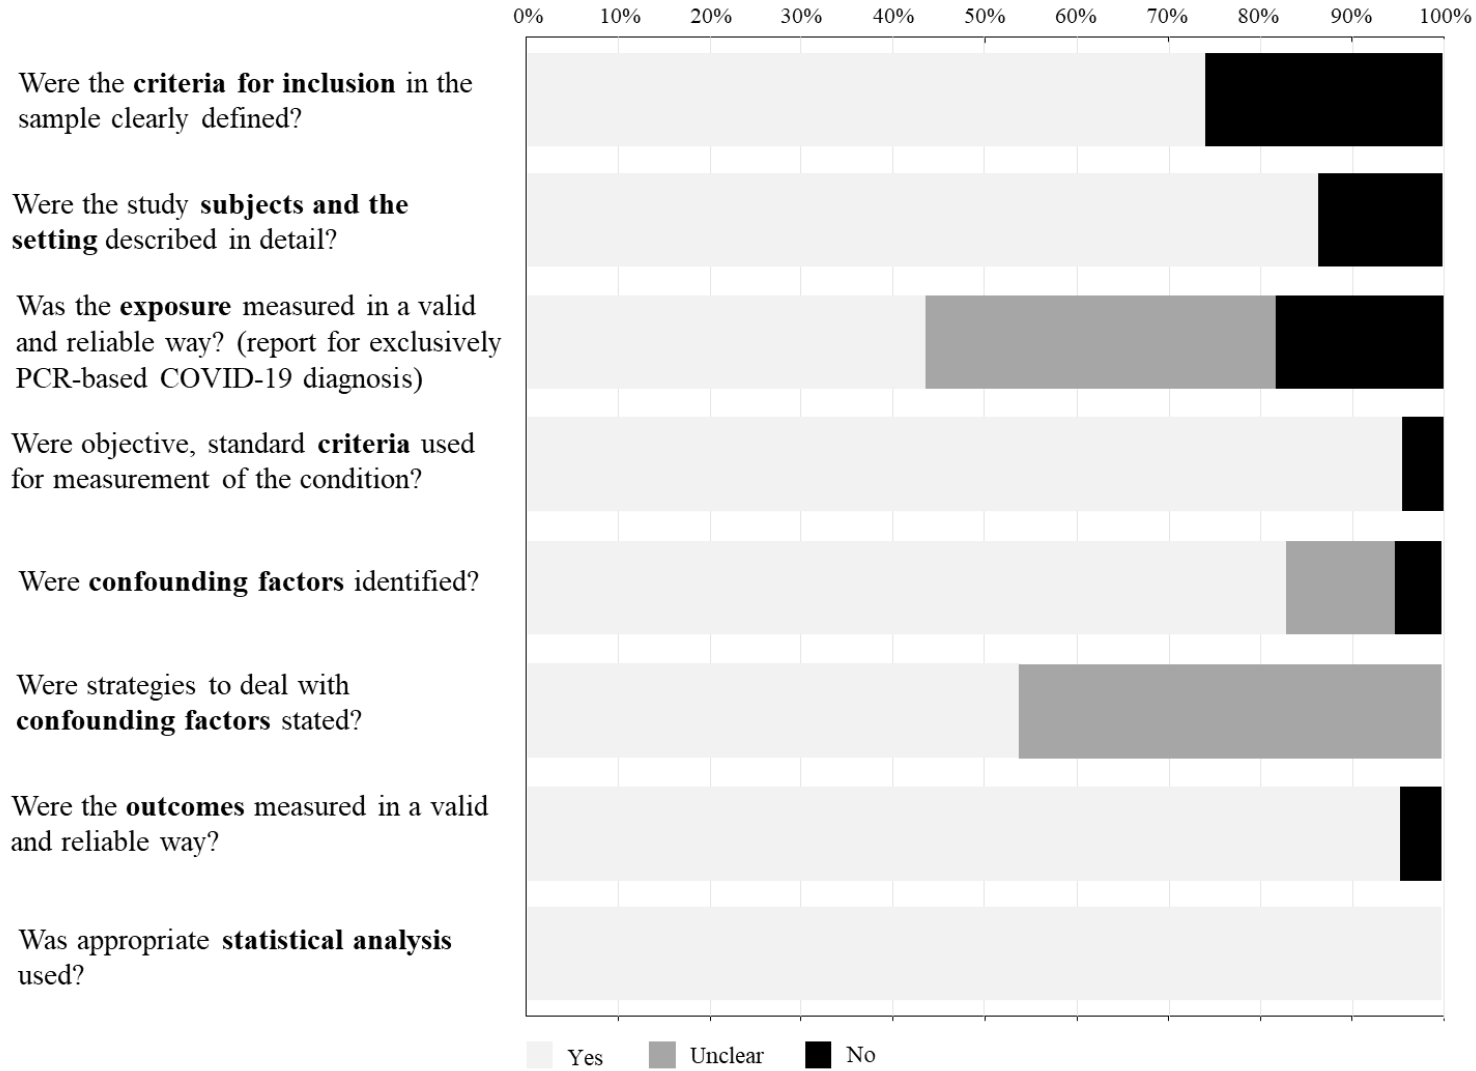

**Supplemental Figure S2.** Plot of prevalence of pulmonary embolism (A) and deep vein thrombosis (B) versus study sample size

**A**

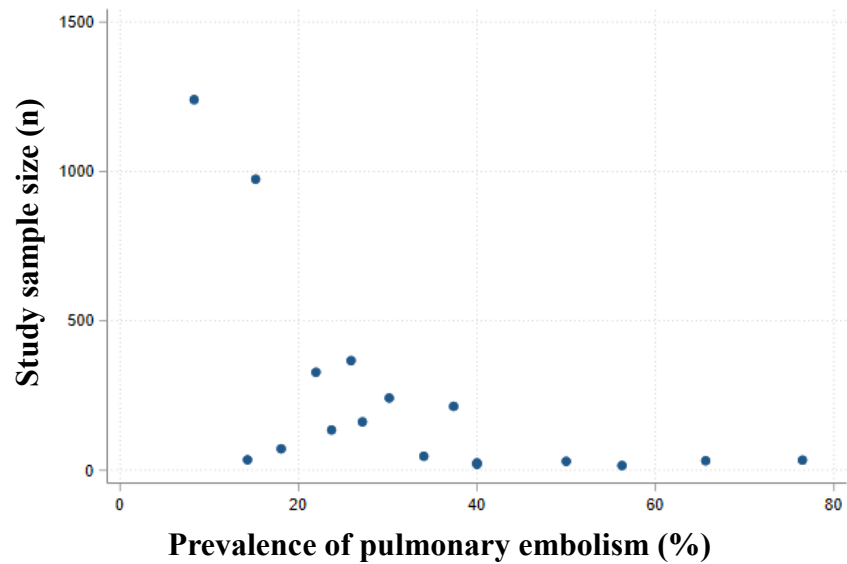

**B**

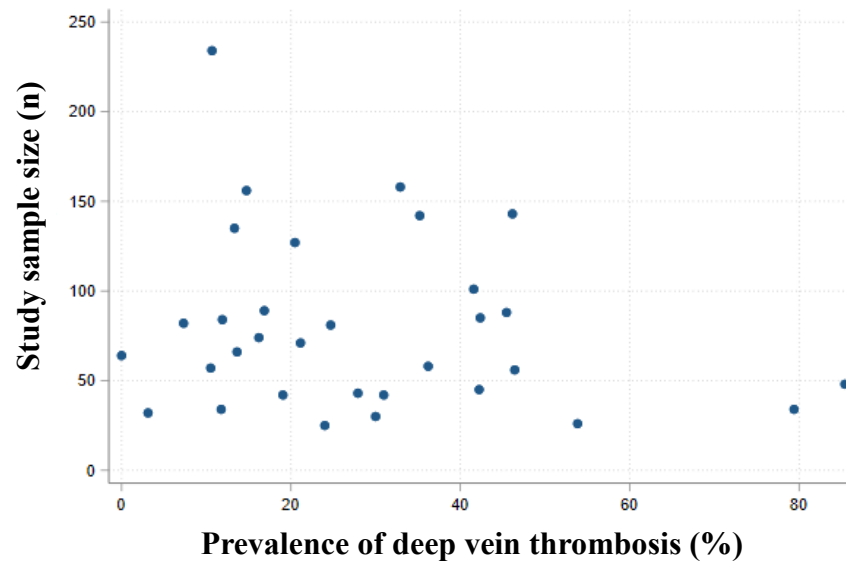

**Supplemental Figure S3.** Meta-regression bubble plots for the associations of the prevalence of venous thromboembolism

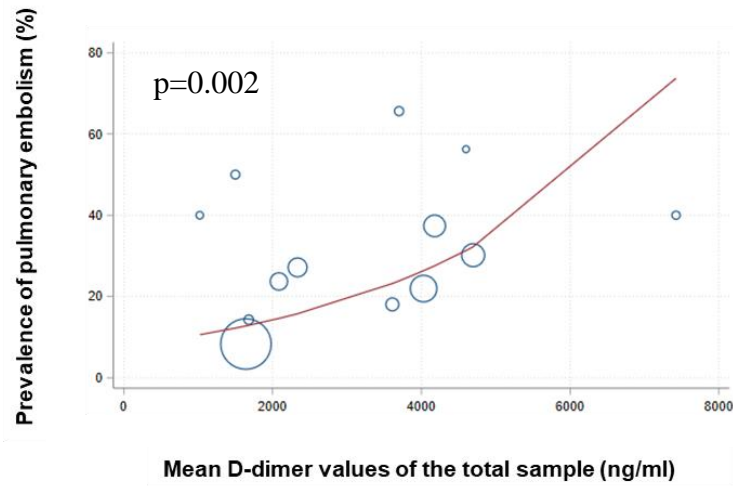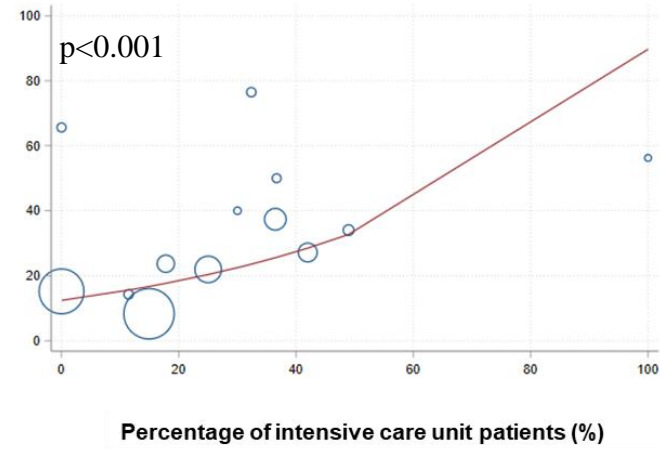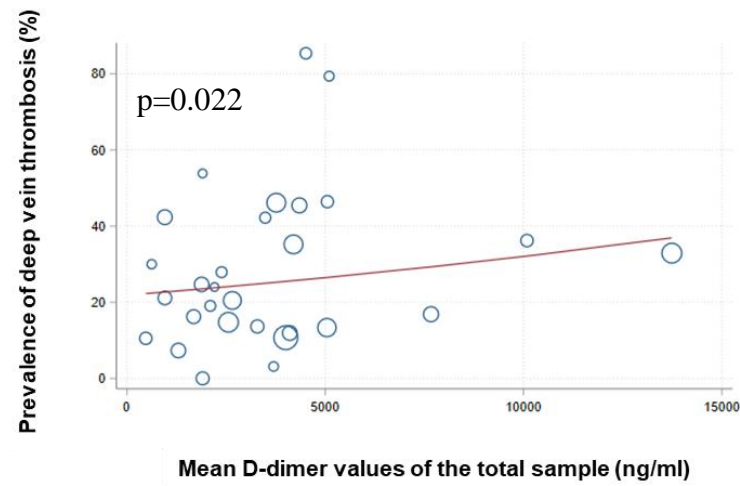

○ Observed incidence rate — Model predicted incidence rate

**Supplemental Figure S4.** Meta-regression bubble plots for the associations of the prevalence of pulmonary embolism after removal of 1 study with extreme values.

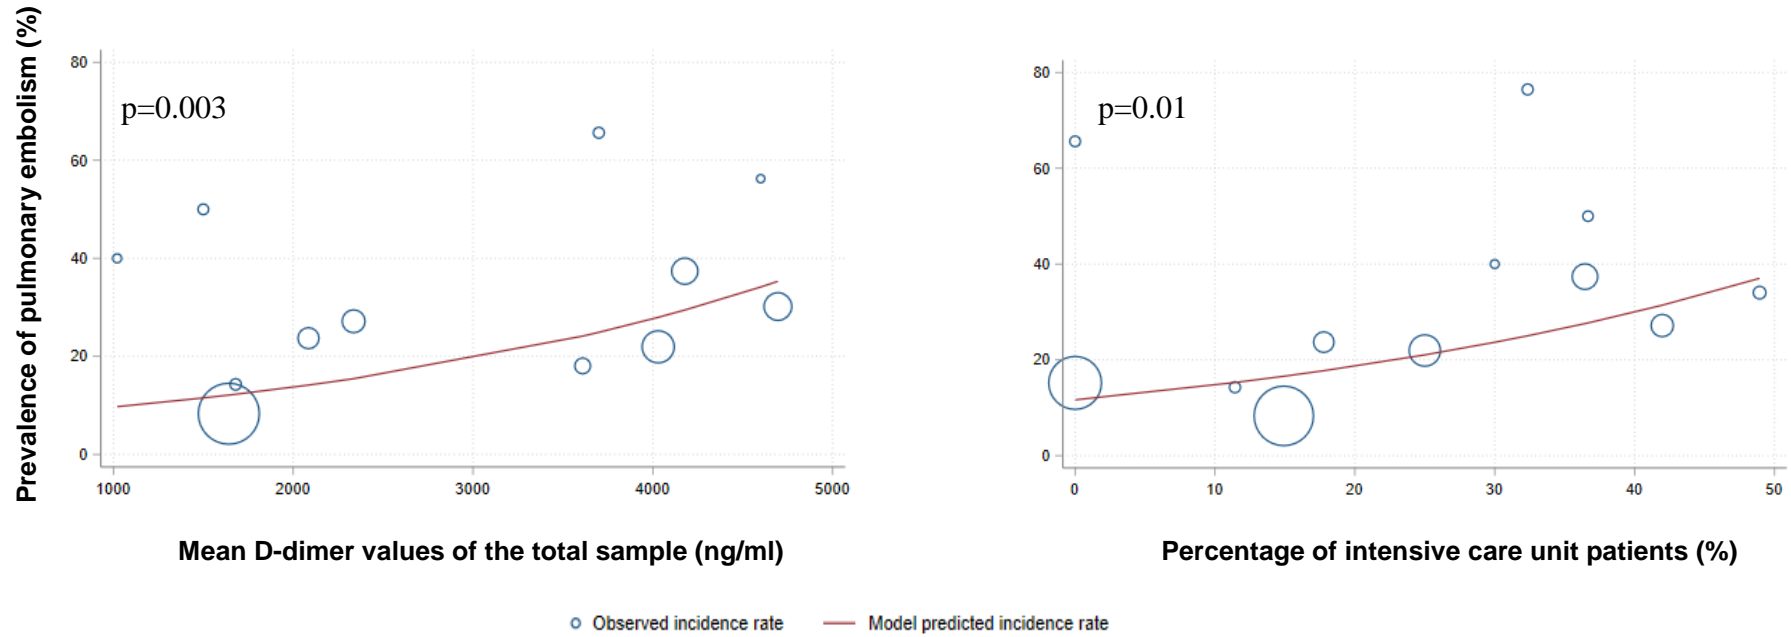

Supplement: sj-pdf-1-vmj-10.1177_1358863X21995566.pdf [file sj-pdf-1-vmj-10.1177_1358863X21995566.pdf]
